# Supplementary material for: Self-standing hollow Ni-doped Mo2C nanotube arrays induced by the Kirkendall effect for an efficient hydrogen evolution reaction in acidic and alkaline solutions
Source: Royal Society of Chemistry journal article supplement (doi:10.1039/d4qi01427h), 2024-01-01
Supplement: d4qi01427h1.pdf [file d4qi01427h1.pdf]

*Electronic Supplementary Information*

**Self-standing hollow Ni-doped Mo<sub>2</sub>C nano tube arrays induced by the Kirkendall effect for efficient hydrogen evolution reaction in acidic and alkaline solutions**

Chen Li, Beirong Ye, Renhong Chen, Yongqi Li, Xin Liu, Tongwei Wu, Hongxian Liu,\* Xinhui Xia, \* Yongqi Zhang\*

Prof. Y. Q. Zhang, Dr. T. Wu, C. Li, B. R. Ye, Y. Q. Li,

Institute of Fundamental and Frontier Sciences, University of Electronic Science and Technology of China, Chengdu 611371, China

Email: yqzhang@uestc.edu.cn

R. H. Chen,

School of Electrical Engineering, University of South China, Hengyang 421001, China

Prof. X. Liu,

State Key Laboratory of New Textile Materials & Advanced Processing Technology

Wuhan Textile University Wuhan 430073, China

Hongxian Liu, liu\_hongxian@163.com

School of Physics and Electronic Science, Zunyi Normal University, Zunyi 563000,

Guizhou, China

Prof. X. H. Xia,

School of Materials Science & Engineering, Zhejiang University of Technology,

Hangzhou 310014, China

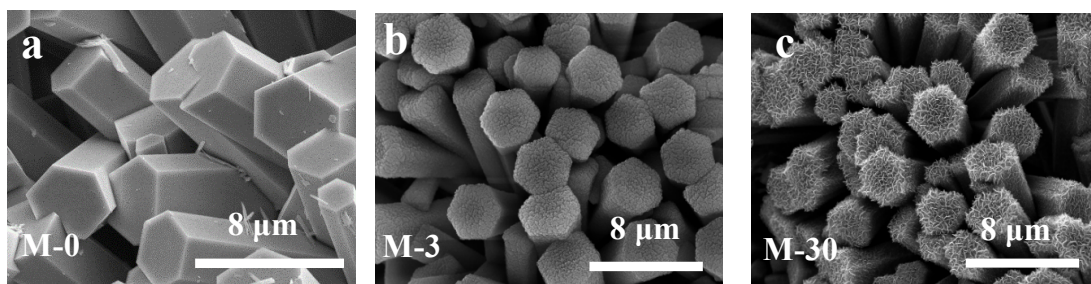

**Figure S1.** SEM images of M-0, M-3, and M-30

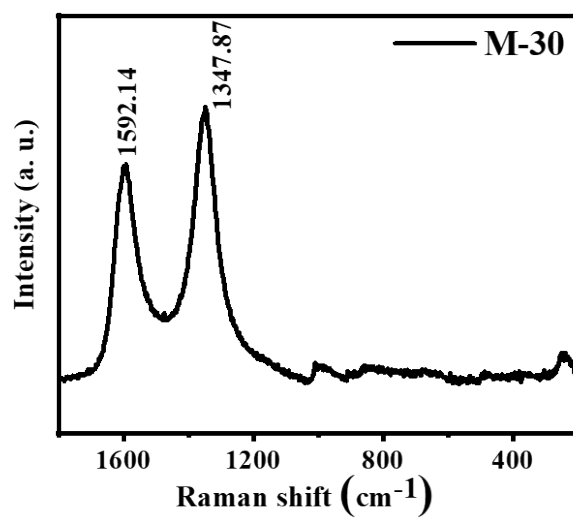

**Figure S2.** Raman spectra of M-30

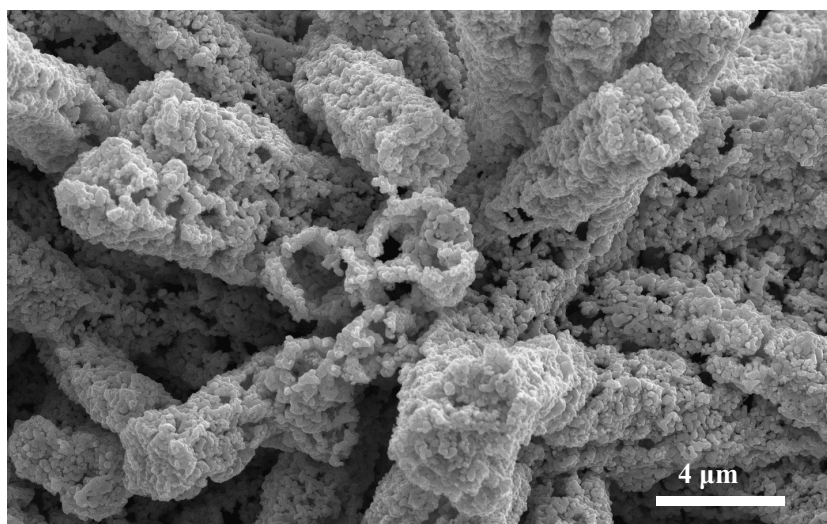

**Figure S3.** SEM image of M-000

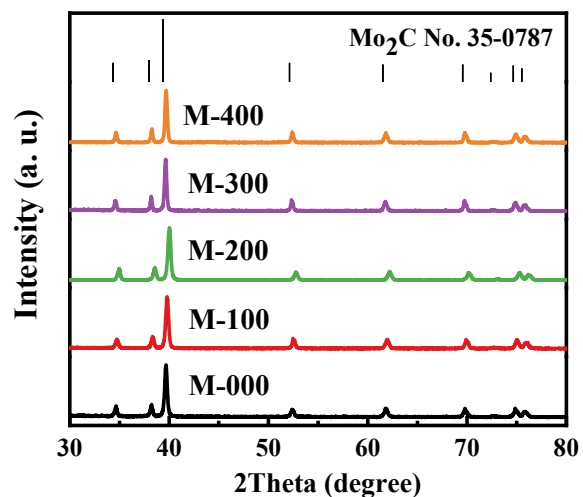

**Figure S4.** The XRD patterns of M-100, M-200, M-300 and M-400.

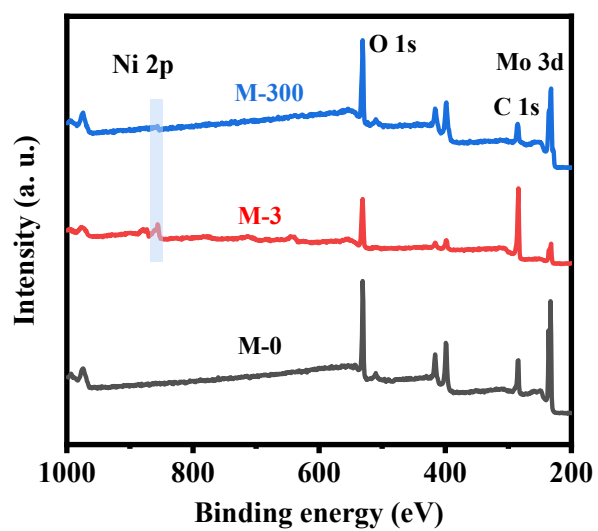

**Figure S5.** The XPS survey spectra of M-0, M-3, and M-300

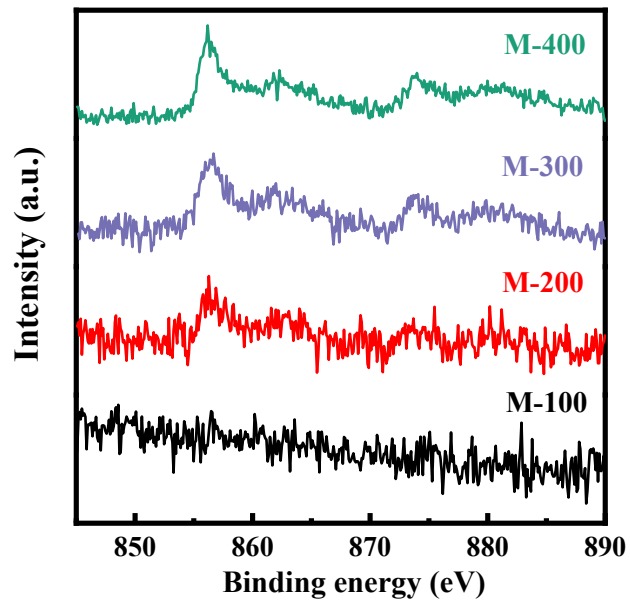

Figure S6. Ni fine spectra of M-100, M-200, M-300 and M-400

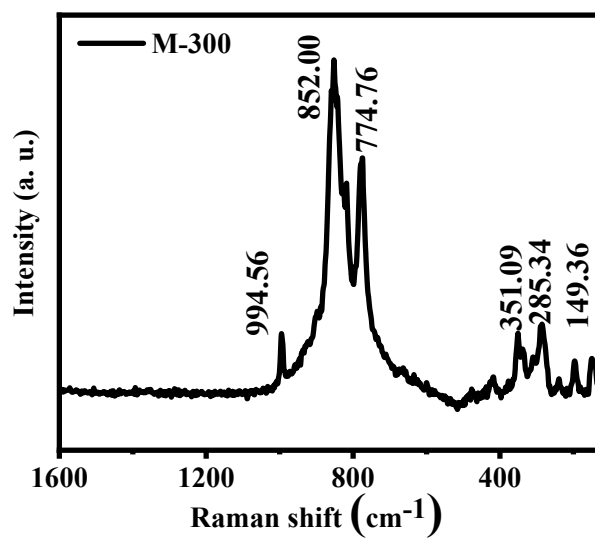

Figure S7. Raman spectrum of M-300

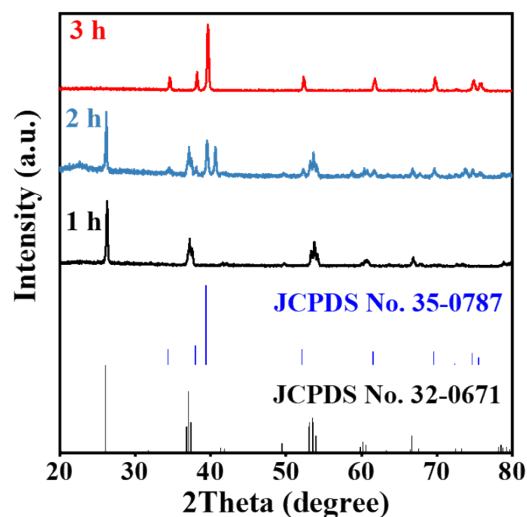

**Figure S8.** XRD patterns of M-30 calcined at 800°C for different time period.

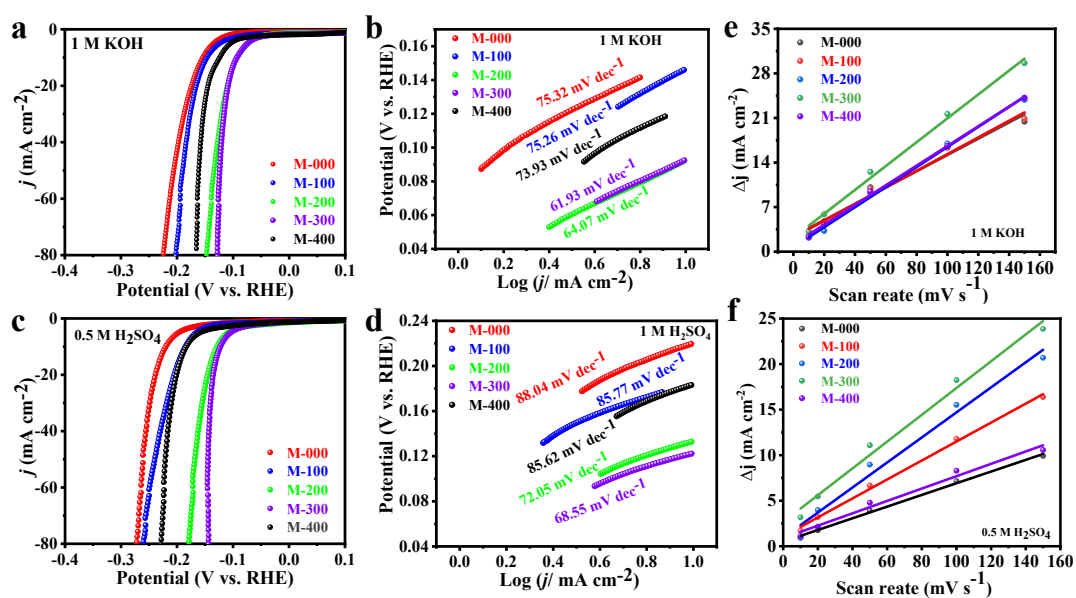

**Figure S9.** (a) and (c) The LSV curves, (b) and (d) the Tafel plots, (e) and (f) Current density as a function of the scan rate for M-000, M-100, M-200, M-300, and M-400 electrodes.

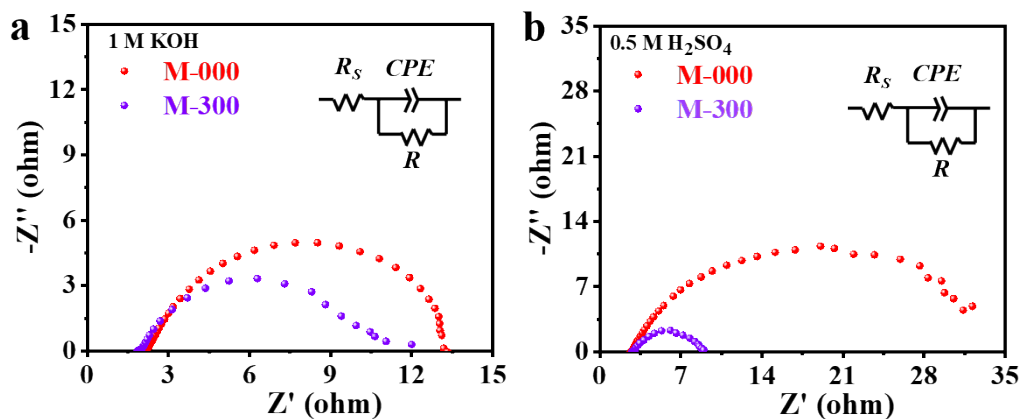

**Figure S10.** The Nyquist plots of M-000 and M-300.

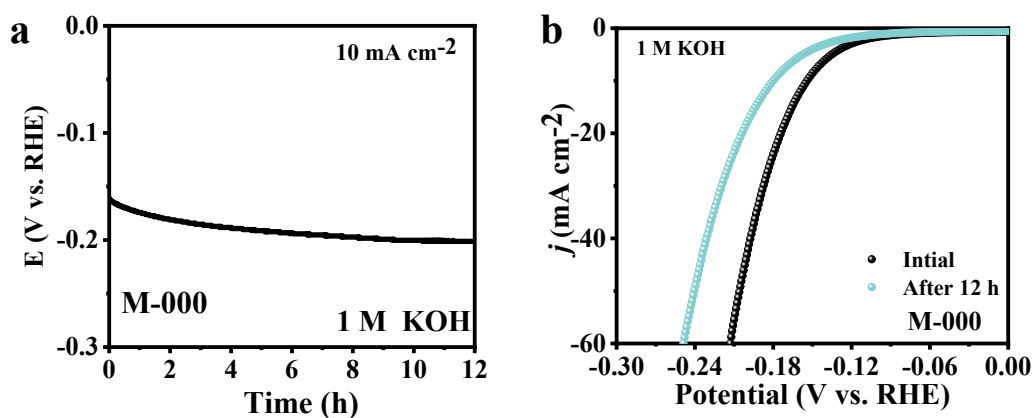

**Figure S11.** (a) The stability curves (voltage vs. time) and (b) LSV curves of initial and after stability tests in 1 M KOH of the M-000.

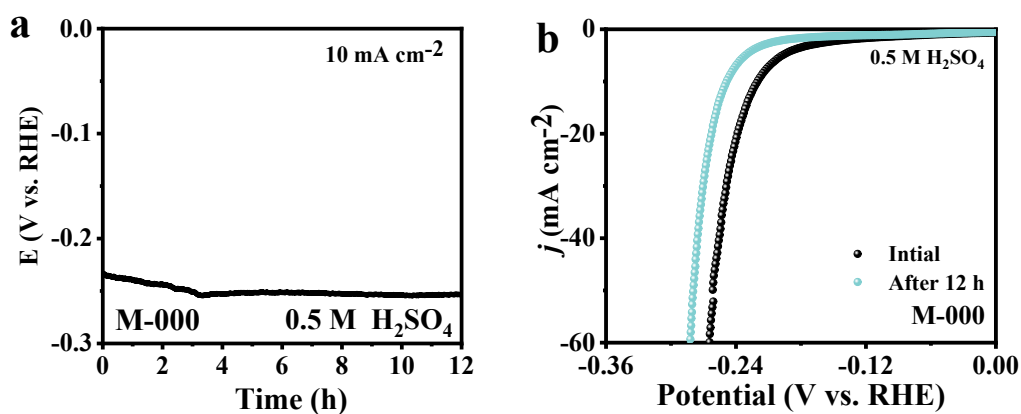

**Figure S12.** (a) The stability curves (voltage vs. time) and (b) LSV curves of initial and after stability tests in 0.5 M H<sub>2</sub>SO<sub>4</sub> of the M-000.

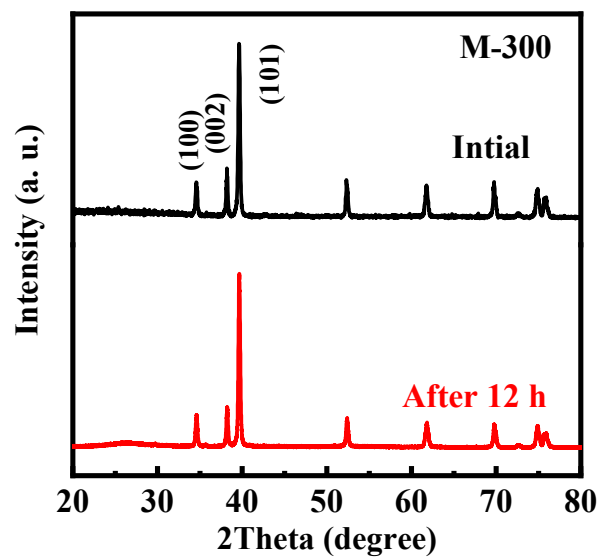

**Figure S13.** XRD patterns of M-300 before and after stability test in 0.5 M  $\text{H}_2\text{SO}_4$

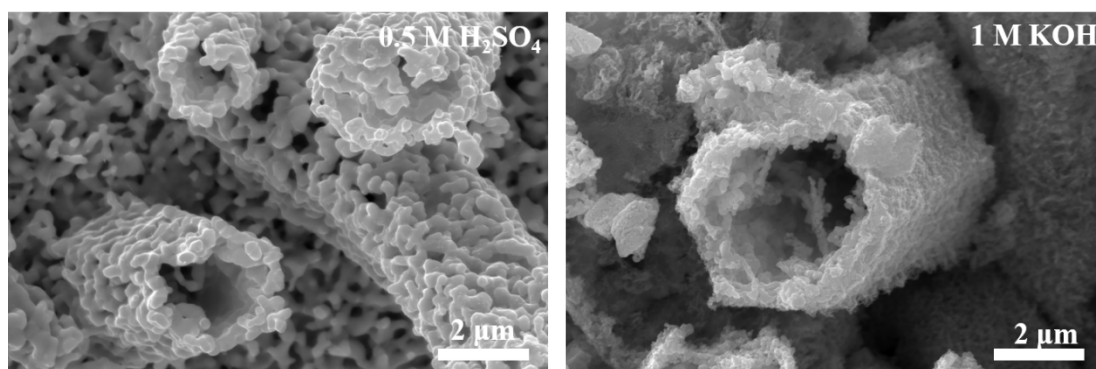

**Figure S14.** SEM images of M-300 after stability test

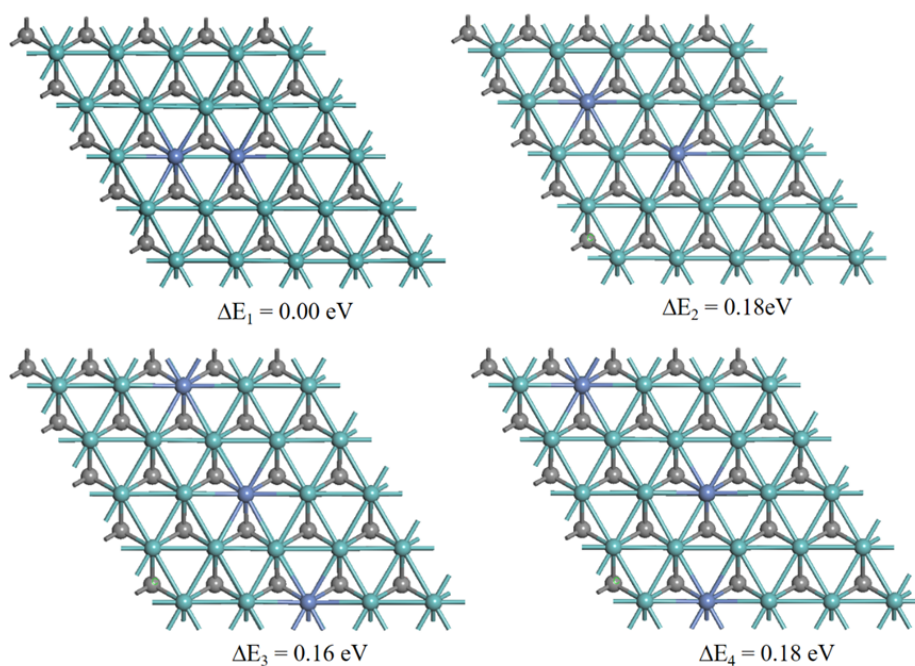

**Figure S15.** The optimized structures of 2Ni-doped  $\text{Mo}_2\text{C}$ .

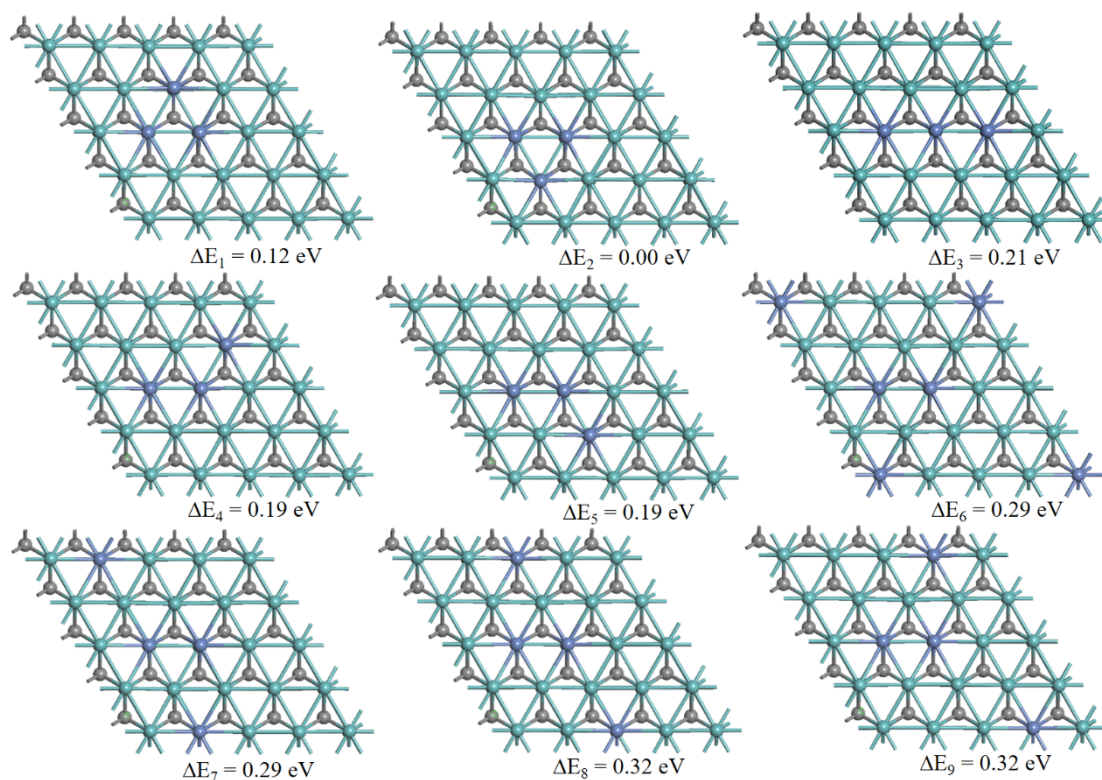

**Figure S16.** The optimized structures of 3Ni-doped  $\text{Mo}_2\text{C}$ .



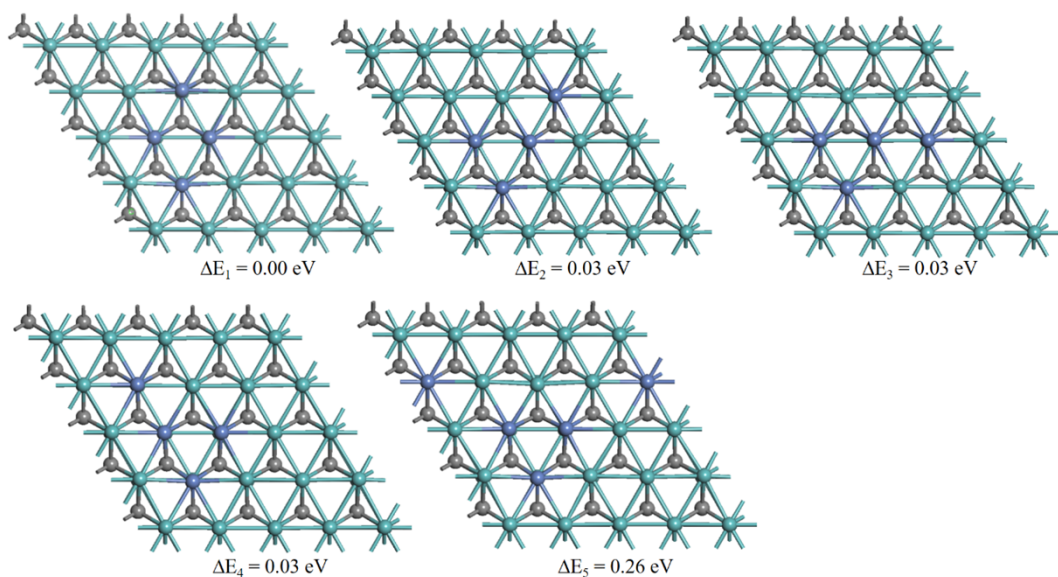

**Figure S17.** The optimized structures of 4Ni-doped  $\text{Mo}_2\text{C}$ .

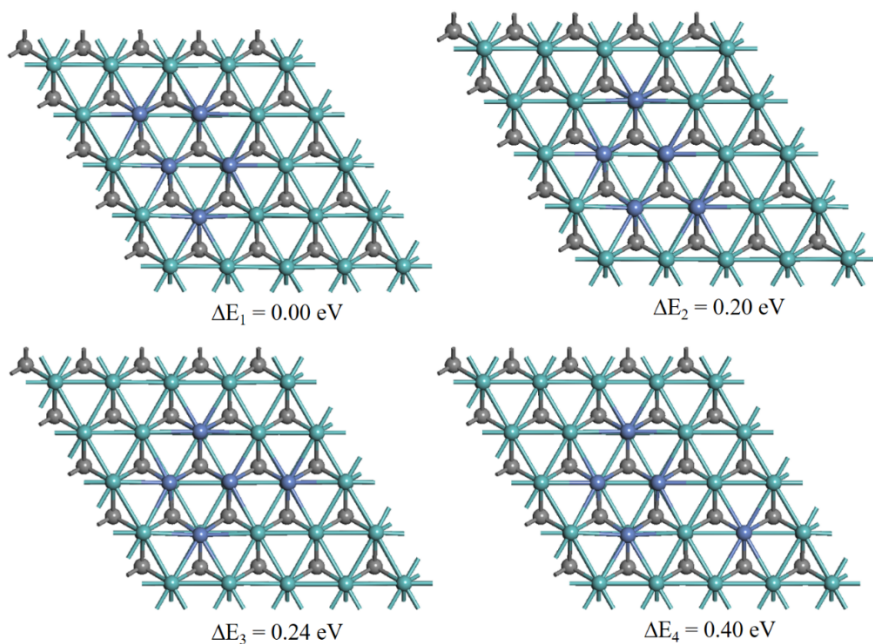

**Figure S18.** The optimized structures of 5Ni-doped  $\text{Mo}_2\text{C}$ .

**Table S1.** The content of Ni, Mo, and C was calculated from XPS fine spectra of M-100, M-200, M-300, and M-400.

|              | $M_{\text{Ni}}$ (%) | $M_{\text{Mo}}$ (%) | $M_{\text{C}}$ (%) |
|--------------|---------------------|---------------------|--------------------|
| <b>M-100</b> | -                   | 38.00               | 61.00              |
| <b>M-200</b> | 3.53                | 80.06               | 16.41              |
| <b>M-300</b> | 8.86                | 75.91               | 15.22              |
| <b>M-400</b> | 10.48               | 72.08               | 17.43              |

**Table S2.** Comparison of HER electrocatalytic activity of M-300 with other recently reported high performance HER electrocatalysts.

| Catalysts                              | Overpotential (mV)<br>at $j=10 \text{ mA cm}^{-2}$ | Electrolyte                              | Reference |
|----------------------------------------|----------------------------------------------------|------------------------------------------|-----------|
| <b>This work (M-300)</b>               | <b>93</b>                                          | <b>1 M KOH</b>                           |           |
| Ni/Mo <sub>2</sub> C(1:2)-NCNFs        | 143                                                | 1 M KOH                                  | 1         |
| Co-NC@Mo <sub>2</sub> C                | 99                                                 | 1 M KOH                                  | 2         |
| Co, Mo <sub>2</sub> C-CNF              | 128                                                | 1 M KOH                                  | 3         |
| Co-Mo <sub>2</sub> C@C                 | 98                                                 | 1 M KOH                                  | 4         |
| Ni/Mo <sub>2</sub> C-NCSs              | 131                                                | 1 M KOH                                  | 5         |
| Co-Mo <sub>2</sub> C-CN <sub>x-2</sub> | 92                                                 | 1 M KOH                                  | 6         |
| Ni-Mo <sub>2</sub> C-0.67              | 151.1                                              | 1 M KOH                                  | 7         |
| <b>This work (M-300)</b>               | <b>122</b>                                         | <b>0.5 M H<sub>2</sub>SO<sub>4</sub></b> |           |
| Co-NC@Mo <sub>2</sub> C                | 143                                                | 0.5 M H <sub>2</sub> SO <sub>4</sub>     | 2         |
| Mo <sub>2</sub> C@NG/CNT               | 160                                                | 0.5 M H <sub>2</sub> SO <sub>4</sub>     | 8         |
| Mo <sub>2</sub> C-GNR                  | 152                                                | 0.5 M H <sub>2</sub> SO <sub>4</sub>     | 9         |
| Ni-Mo <sub>2</sub> C-0.67              | 165                                                | 0.5 M H <sub>2</sub> SO <sub>4</sub>     | 7         |
| L-Mo <sub>2</sub> C                    | 170                                                | 0.5 M H <sub>2</sub> SO <sub>4</sub>     | 10        |
| Mo <sub>2</sub> C/W <sub>2</sub> C     | 140                                                | 0.5 M H <sub>2</sub> SO <sub>4</sub>     | 11        |
| VN/Mo <sub>2</sub> C                   | 140                                                | 0.5 M H <sub>2</sub> SO <sub>4</sub>     | 12        |

#### Reference

1. M. Li, Y. Zhu, H. Wang, C. Wang, N. Pinna and X. Lu, *Advanced Energy Materials*, 2019, **9**, 1803185.
2. Q. Liang, H. Jin, Z. Wang, Y. Xiong, S. Yuan, X. Zeng, D. He and S. Mu, *Nano Energy*, 2019, **57**, 746-752.
3. J. Wang, R. Zhu, J. Cheng, Y. Song, M. Mao, F. Chen and Y. Cheng, *Chemical Engineering Journal*, 2020, **397**, 125481.
4. S. Yuan, M. Xia, Z. Liu, K. Wang, L. Xiang, G. Huang, J. Zhang and N. Li, *Chemical Engineering Journal*, 2022, **430**, 132697.
5. Y. Xu, J. Yang, T. Liao, R. Ge, Y. Liu, J. Zhang, Y. Li, M. Zhu, S. Li and W. Li, *Chemical Engineering Journal*, 2022, **431**, 134126.
6. P. Zhang, Y. Liu, T. Liang, E. H. Ang, X. Zhang, F. Ma and Z. Dai, *Applied Catalysis B: Environmental*, 2021, **284**, 119738.
7. W. Liu, X. Wang, J. Qu, X. Liu, Z. Zhang, Y. Guo, H. Yin and D. Wang, *Applied*

- Catalysis B: Environmental*, 2022, **307**, 121201.
8. C. Yang, K. Shen, R. Zhao, H. Xiang, J. Wu, W. Zhong, Q. Zhang, X. Li and N. Yang, *Advanced Functional Materials*, 2021, **32**, 2108167.
  9. X. Fan, Y. Liu, Z. Peng, Z. Zhang, H. Zhou, X. Zhang, B. I. Yakobson, W. A. Goddard, X. Guo, R. H. Hauge and J. M. Tour, *ACS Nano*, 2017, **11**, 384-394.
  10. W. Yuan, Q. Huang, X. Yang, Z. Cui, S. Zhu, Z. Li, S. Du, N. Qiu and Y. Liang, *ACS Applied Materials & Interfaces*, 2018, **10**, 40500-40508.
  11. Y. Ling, F. M. D. Kazim, Q. Zhang, S. Xiao, M. Li and Z. Yang, *International Journal of Hydrogen Energy*, 2021, **46**, 9699-9706.
  12. L. Feng, S. Li, D. He, L. Cao, G. Li, P. Guo and J. Huang, *ACS Sustainable Chemistry & Engineering*, 2021, **9**, 15202-15211.
